# Supplementary material
Source: publisher site journal article supplement (https://www.dovepress.com/article/180151)
Supplement: Supplementary file 1 [file get_supplementary_file.php]

## Supplementary materials

**Table S1. Changes of blood cells classification**

| Index                         | Group          | before thrombus injection | 60 mins after injection | 60 mins after drug admin | 6 days after drug admin |
|-------------------------------|----------------|---------------------------|-------------------------|--------------------------|-------------------------|
| WBC<br>(10 <sup>9</sup> /L)   | Sham operation | 7.34 (4.51 – 11.59)       | 4.70 (2.30 – 10.6)      | 5.36 (2.15 – 10.32)      | 10.84 (9.49 – 35.12)    |
|                               | Vehicle        | 6.32 (4.93 – 11.93)       | 2.46 (0.95 – 7.07)      | 3.54 (1.47 – 8.49)       | 12.00 (9.98 – 16.50)    |
|                               | Alteplase      | 6.93 (5.93 – 14.22)       | 5.24 (0.76 – 9.80)      | 5.03 (1.84 – 19.56)      | 12.56 (10.16 – 15.63)   |
|                               | Retepase       | 5.85 (4.52 – 12.10)       | 3.98 (3.27 – 9.78)      | 5.38 (3.51 – 7.91)       | 11.46 (9.78 – 16.32)    |
| RBC<br>(10 <sup>12</sup> /L)  | Sham operation | 4.82 (1.48 – 5.49)        | 5.00 (3.98 – 6.70)      | 4.94 (4.49 – 6.54)       | 6.28 (5.05 – 6.56)      |
|                               | Vehicle        | 5.31 (5.14 – 5.91)        | 5.68 (4.98 – 6.56)      | 6.13 (5.23 – 7.54)       | 6.42 (5.76 – 7.12)      |
|                               | Alteplase      | 4.70 (4.29 – 6.29)        | 5.58 (4.53 – 7.11)      | 5.93 (5.10 – 7.93)       | 6.04 (5.54 – 6.91)      |
|                               | Retepase       | 5.53 (4.53 – 6.96)        | 6.22 (4.59 – 8.91)      | 6.40 (5.00 – 7.53)       | 6.43 (6.09 – 7.28)      |
| NEUT<br>(10 <sup>9</sup> /L)  | Sham operation | 5.06 (3.02 – 8.00)        | 3.40 (1.57 – 7.70)      | 3.78 (1.31 – 7.89)       | 7.24 (6.11 – 23.50)     |
|                               | Vehicle        | 4.01 (2.27 – 9.21)        | 1.21 (0.35 – 5.09)      | 2.28 (0.83 – 6.72)       | 7.60 (6.11 – 12.26)     |
|                               | Alteplase      | 4.31 (3.17 – 10.35)       | 2.97 (0.05 – 7.79)      | 3.43 (0.01 – 17.36)      | 8.30 (6.35 – 11.25)     |
|                               | Retepase       | 4.07 (2.62 – 8.34)        | 2.50 (1.59 – 7.25)      | 3.67 (2.20 – 5.42)       | 7.79 (5.20 – 11.26)     |
| LYMPH<br>(10 <sup>9</sup> /L) | Sham operation | 1.65 (1.11 – 2.93)        | 1.08 (0.57 – 2.09)      | 1.21 (0.65 – 1.69)       | 2.84 (2.31 – 4.62)      |
|                               | Vehicle        | 1.51 (1.36 – 1.98)        | 1.09 (0.50 – 1.38)      | 0.96 (0.55 – 1.19)       | 2.98 (2.70 – 3.26)      |
|                               | Alteplase      | 2.21 (1.47 – 2.88)        | 1.31 (0.64 – 1.78)      | 1.20 (0.70 – 1.65)       | 3.19 (2.74 – 3.98)      |
|                               | Retepase       | 1.50 (0.98 – 2.83)        | 0.95 (0.67 – 1.87)      | 1.19 (0.70 – 2.16)       | 3.20 (2.13 – 4.01)      |
| MONO<br>(10 <sup>9</sup> /L)  | Sham operation | 0.36 (0.15 – 0.61)        | 0.13 (0.02 – 0.48)      | 0.14 (0.06 – 0.44)       | 0.52 (0.34 – 6.45)      |
|                               | Vehicle        | 0.43 (0.17 – 0.56)        | 0.04 (0.03 – 0.40)      | 0.14 (0.03 – 0.33)       | 0.70 (0.46 – 1.24)      |
|                               | Alteplase      | 0.43 (0.29 – 0.79)        | 0.19 (0.01 – 0.46)      | 0.25 (0.01 – 0.75)       | 0.50 (0.34 – 0.60)      |
|                               | Retepase       | 0.34 (0.20 – 0.65)        | 0.14 (0.04 – 0.49)      | 0.35 (0.15 – 0.89)       | 0.62 (0.28 – 0.91)      |
| EOS<br>(10 <sup>9</sup> /L)   | Sham operation | 0.25 (0.11 – 0.73)        | 0.16 (0.06 – 0.51)      | 0.17 (0.03 – 0.51)       | 0.25 (0.11 – 0.47)      |
|                               | Vehicle        | 0.24 (0.15 – 0.37)        | 0.08 (0.05 – 0.17)      | 0.12 (0.03 – 0.19)       | 0.32 (0.13 – 0.48)      |
|                               | Alteplase      | 0.42 (0.16 – 0.53)        | 0.17 (0.05 – 0.27)      | 0.13 (0.09 – 0.35)       | 0.31 (0.20 – 0.36)      |
|                               | Retepase       | 0.24 (0.15 – 0.40)        | 0.12 (0.07 – 0.29)      | 0.20 (0.10 – 0.29)       | 0.32 (0.18 – 0.79)      |
| BASO<br>(10 <sup>9</sup> /L)  | Sham operation | 0.06 (0.01 – 0.21)        | 0.02 (0.01 – 0.04)      | 0.02 (0.01 – 0.05)       | 0.04 (0.02 – 0.20)      |
|                               | Vehicle        | 0.08 (0.03 – 0.12)        | 0.02 (0.02 – 0.03)      | 0.03 (0.02 – 0.03)       | 0.05 (0.03 – 0.08)      |
|                               | Alteplase      | 0.03 (0.01 – 0.20)        | 0.01 (0.01 – 0.05)      | 0.01 (0.01 – 0.09)       | 0.05 (0.02 – 0.07)      |
|                               | Retepase       | 0.02 (0.01 – 0.10)        | 0.01 (0.01 – 0.05)      | 0.01 (0.01 – 0.13)       | 0.06 (0.03 – 0.08)      |
| LUC<br>(10 <sup>9</sup> /L)   | Sham operation | 0.01 (0.01 – 0.02)        | 0.01 (0.01 – 0.01)      | 0.01 (0.01 – 0.01)       | 0.03 (0.02 – 0.23)      |
|                               | Vehicle        | 0.03 (0.01 – 0.05)        | 0.01 (0.01 – 0.01)      | 0.02 (0.01 – 0.03)       | 0.04 (0.02 – 0.07)      |

| Index     | Group          | before thrombus injection | 60 mins after injection | 60 mins after drug admin | 6 days after drug admin |
|-----------|----------------|---------------------------|-------------------------|--------------------------|-------------------------|
|           | Alteplase      | 0.05 (0.02 – 0.06)        | 0.02 (0.01 – 0.04)      | 0.01 (0.01 – 0.03)       | 0.05 (0.03 – 0.10)      |
|           | Retepase       | 0.05(0.01 – 0.08)         | 0.02 (0.01 – 0.06)      | 0.03 (0.01 – 0.05)       | 0.04 (0.03 – 0.17)      |
| NEUT (%)  | Sham operation | 66.55 (58.40 – 69.10)     | 70.55 (68.00 – 74.70)   | 68.15 (61.10 – 76.40)    | 65.60 (63.00 – 71.00)   |
|           | Vehicle        | 65.45 (46.20 – 77.30)     | 54.60 (36.40 – 72.00)   | 63.70 (52.70 – 79.20)    | 64.10 (61.00 – 74.30)   |
|           | Alteplase      | 63.05 (49.40 – 72.70)     | 64.56.(6.50 – 79.50)    | 70.00 (0.70 – 88.80)     | 66.25 (62.30 – 74.70)   |
|           | Retepase       | 64.00 (47.10 – 74.80)     | 68.75 (40.80 – 76.60)   | 65.50 (39.50 – 76.20)    | 67.95 (51.80 – 69.00)   |
|           | Sham operation | 24.85 (20.70 – 28.60)     | 22.40 (16.70 – 26.40)   | 22.80 (16.40 – 30.40)    | 26.10 (13.10 – 28.50)   |
| LYMPH (%) | Vehicle        | 23.20 (14.20 – 40.20)     | 39.70 (19.50 – 52.50)   | 29.40 (14.00 – 39.60)    | 25.50 (18.00 – 29.80)   |
|           | Alteplase      | 26.30 (19.90 – 35.40)     | 27.45 (13.00 – 84.80)   | 20.85 (5.70 – 89.80)     | 25.85 (21.00 – 29.60)   |
|           | Retepase       | 24.15 (17.10 – 37.80)     | 19.80 (13.90 – 26.70)   | 24.05 (13.90 – 37.60)    | 24.70 (21.80 – 35.30)   |
|           | Sham operation | 3.75 (3.40 – 8.40)        | 2.50 (1.00 – 4.60)      | 2.85 (2.00 – 4.90)       | 4.80 (3.40 – 18.40)     |
| MONO (%)  | Vehicle        | 5.20 (3.00 – 9.30)        | 1.80 (1.40 – 5.70)      | 3.45 (1.90 – 5.40)       | 5.70 (3.90 – 10.10)     |
|           | Alteplase      | 5.40 (2.90 – 8.20)        | 2.65 (1.00 – 9.40)      | 4.00 (0.70 – 8.20)       | 3.85 (2.40 – 5.30)      |
|           | Retepase       | 4.90 (3.60 – 7.30)        | 3.65 (1.30 – 6.10)      | 6.30 (3.50 – 15.50)      | 4.30 (2.60 – 7.70)      |
|           | Sham operation | 3.70 (1.80 – 6.60)        | 3.35 (1.30 – 6.70)      | 3.30 (0.90 – 7.00)       | 2.50 (0.30 – 3.90)      |
| EOS (%)   | Vehicle        | 3.40 (2.20 – 5.00)        | 3.30 (2.40 – 5.30)      | 2.40 (2.00 – 4.80)       | 2.35 (1.30 – 3.90)      |
|           | Alteplase      | 3.90 (2.30 – 7.30)        | 3.85 (1.00 – 6.50)      | 2.50 (0.70 – 8.00)       | 2.40 (1.40 – 3.30)      |
|           | Retepase       | 4.05 (1.50 – 6.60)        | 3.60 (1.20 – 7.40)      | 3.75 (1.20 – 6.70)       | 2.35 (1.80 – 6.30)      |
|           | Sham operation | 0.35 (0.20 – 1.30)        | 0.30 (0.10 – 0.80)      | 0.45 (0.20 – 0.70)       | 0.30 (0.20 – 0.60)      |
| BASO (%)  | Vehicle        | 1.10 (0.50 – 2.10)        | 0.80 (0.40 – 1.80)      | 0.70 (0.40 – 1.90)       | 0.40 (0.30 – 0.50)      |
|           | Alteplase      | 0.35 (0.01 – 3.20)        | 0.25 (0.10 – 0.80)      | 0.25 (0.10 – 0.80)       | 0.35 (0.20 – 0.50)      |
|           | Retepase       | 0.40 (0.10 – 1.50)        | 0.30 (0.10 – 1.50)      | 0.25 (0.10 – 2.20)       | 0.40 (0.30 -0.50)       |
|           | Sham operation | 0.15 (0.10 – 0.30)        | 0.10 (0.10 – 0.30)      | 0.10 (0.10 – 0.20)       | 0.30 (0.20 – 0.70)      |
| LUC (%)   | Vehicle        | 0.35 (0.10 – 0.80)        | 0.30 (0.10 – 0.50)      | 0.45 (0.20 – 0.90)       | 0.30 (0.20 – 0.60)      |
|           | Alteplase      | 0.55 (0.20 – 0.90)        | 0.20 (0.01 – 0.80)      | 0.15 (0.01 – 0.60)       | 0.35 (0.20 – 0.90)      |
|           | Retepase       | 0.65 (0.20 – 1.20)        | 0.35 (0.10 – 1.50)      | 0.45 (0.10 – 0.90)       | 0.30 (0.20 – 1.70)      |
|           | Sham operation | 123 (114 - 132)           | 125.5 (114 – 160)       | 127 (120 - 155)          | 152.5 (133 - 156)       |
| HGB (g/L) | Vehicle        | 133 (128 – 140)           | 143 (133 -160)          | 153 (126 - 191)          | 161.5 (149 - 170)       |

| Index                    | Group          | before thrombus injection | 60 mins after injection | 60 mins after drug admin | 6 days after drug admin      |
|--------------------------|----------------|---------------------------|-------------------------|--------------------------|------------------------------|
|                          | Alteplase      | 123.5 (117 - 158)         | 132.5 (121 - 175)       | 149.5 (121 - 193)        | 152 (137 - 162)              |
|                          | Retepase       | 133 (117 - 165)           | 133 (30 - 167)          | 153.5 (129 - 181)        | 156 (147 - 176)              |
|                          | Sham operation | 39.95 (11.10 – 43.90)     | 39.30 (29.50 – 51.00)   | 40.35 (31.30 – 49.30)    | 43.40 (36.30 – 53.00)        |
| HCT (%)                  | Vehicle        | 44.10 (41.20 – 45.60)     | 44.40 (40.70 – 52.10)   | 47.95 (42.20 – 62.70)    | 44.10 (40.20 – 55.70)        |
|                          | Alteplase      | 37.55 (32.70 – 51.80)     | 42.35 (34.80 – 59.00)   | 43.15 (37.30 – 64.20)    | 43.00 (38.80 – 52.30)        |
|                          | Retepase       | 42.25 (35.40 – 51.40)     | 45.40 (33.60 – 67.50)   | 45.35 (37.70 – 57.70)    | 44.55 (40.50 – 47.90)        |
|                          | Sham operation | 25.75 (23.60 – 78.70)     | 25.05 (23.30 – 28.60)   | 25.15 (23.20 – 27.50)    | 23.85 (23.40 – 27.20)        |
| MCH (pg)                 | Vehicle        | 25.25 (23.70 – 26.10)     | 25.60 (23.50 – 26.60)   | 24.85 (23.10 – 26.00)    | 24.65 (22.70 – 28.30)        |
|                          | Alteplase      | 25.10 (23.90 – 31.60)     | 24.00 (23.20 – 28.10)   | 23.75 (23.30 – 27.70)    | 24.75 (23.40 – 27.30)        |
|                          | Retepase       | 24.15 (23.80 – 27.60)     | 23.65 (3.40 – 26.50)    | 23.95 (23.50 – 25.70)    | 24.25 (23.70 – 25.70)        |
|                          | Sham operation | 301 (289 - 339)           | 314.5 (299 - 385)       | 316 (298 - 331)          | 350.5 (294 - 388)            |
| MCHC (g/L)               | Vehicle        | 308 (287 - 323)           | 322 (307 - 326)         | 307.5 (298 - 331)        | 367.5 (288 - 391)            |
|                          | Alteplase      | 322 (305 - 417)           | 313 (297 - 366)         | 322.5 (300 - 370)        | 343 (309 - 390)              |
|                          | Retepase       | 325.5 (302 - 361)         | 318.5 (44 - 361)        | 323 (303 - 343)          | 348.5 (339 - 386)            |
|                          | Sham operation | 12.20 (11.90 – 14.30)     | 13.20 (12.70 – 14.10)   | 12.95 (12.10 – 17.10)    | 13.95 (12.20 – 15.00)        |
| RDW (%)                  | Vehicle        | 12.65 (11.90 – 14.90)     | 13.50 (12.30 – 14.90)   | 12.95 (12.00 – 15.20)    | 13.90 (12.70 – 16.00)        |
|                          | Alteplase      | 12.30 (11.80 – 14.90)     | 13.15 (12.70 – 15.70)   | 14.30 (12.60 – 17.00)    | 14.15 (12.80 – 15.30)        |
|                          | Retepase       | 12.85 (11.90 – 14.80)     | 14.10 (12.10 – 15.00)   | 13.90 (12.70 – 16.50)    | 14.25 (13.40 – 15.90)        |
|                          | Sham operation | 292 (222 - 824)           | 235 (196 - 272)         | 227.5 (197 - 245)        | 317.5 (118 - 438)            |
| PLT (10 <sup>9</sup> /L) | Vehicle        | 303 (199 - 372)           | 214 (129 - 251)         | 209.5 (112 - 301)        | 272 (179 - 314)              |
|                          | Alteplase      | 332.5 (237 - 690)         | 242.5 (149 - 266)       | 227.5 (123 - 277)        | 342 (315 - 383) <sup>#</sup> |
|                          | Retepase       | 304.5 (237 - 779)         | 231 (111 - 282)         | 242 (163 - 272)          | 331 (270 - 459)              |
|                          | Sham operation | 17.80 (16.50 – 28.70)     | 17.15 (14.50 – 20.60)   | 16.80 (15.40 – 20.40)    | 20.00 (14.90 – 25.70)        |
| MPV (fL)                 | Vehicle        | 16.35 (15.40 – 16.80)     | 16.00 (13.90 – 16.50)   | 16.25 (14.60 – 17.80)    | 15.75 (13.90 – 24.00)        |

| Index | Group     | before thrombus injection | 60 mins after injection | 60 mins after drug admin | 6 days after drug admin |
|-------|-----------|---------------------------|-------------------------|--------------------------|-------------------------|
|       | Alteplase | 17.00 (11.30 – 25.00)     | 15.60 (11.40 – 23.10)   | 14.90 (14.30 – 21.20)    | 18.05 (15.80 – 23.10)   |
|       | Reteplase | 15.30 (10.10 – 28.50)     | 14.85 (9.80 – 18.40)    | 14.35 (9.80 – 20.10)     | 18.60 (13.50 – 22.00)   |

Data presented as median (range: min - max). (n = 6).

Compared to vehicle group, # $P < 0.05$ .

**Table S2. Changes of the blood biochemical indexes**

| Index            | Group          | before thrombus injection | 60 mins after injection | 60 mins after drug admin | 6 days after drug admin |
|------------------|----------------|---------------------------|-------------------------|--------------------------|-------------------------|
| ALP<br>(U/L)     | Sham operation | 72.95 (34.60 – 109.90)    | 84.55 (35.30 – 115.80)  | 75.25 (35.90 – 110.80)   | 113.00 (79.40 – 130.60) |
|                  | Vehicle        | 69.20 (62.40 – 141.50)    | 71.20 (63.40 – 155.10)  | 87.60 (64.50 – 154.70)   | 98.50 (56.00 – 189.10)  |
|                  | Alteplase      | 94.80 (55.30 – 166.80)    | 91.60 (54.50 – 187.10)  | 82.75 (59.20 – 166.40)   | 125.15 (84.60 – 202.60) |
|                  | Reteplase      | 91.85 (68.90 – 114.70)    | 100.65 (75.20 – 116.90) | 90.95 (75.20 – 158.60)   | 128.55 (84.60 – 163.50) |
| ALT<br>(U/L)     | Sham operation | 24.0 (19.0 – 34.0)        | 25.0 (19.0 – 36.0)      | 26.0 (18.0 – 36.0)       | 27.5 (20.0 – 30.0)      |
|                  | Vehicle        | 23.5 (21.0 – 26.0)        | 22.5 (20.0 – 30.0)      | 23.0 (20.0 – 27.0)       | 25.5 (23.0 – 31.0)      |
|                  | Alteplase      | 27.0 (22.0 – 30.0)        | 25.5 (19.0 – 32.0)      | 27.0 (17.0 – 29.0)       | 26.5 (24.0 – 43.0)      |
|                  | Reteplase      | 24.5 (20.0 – 29.0)        | 24.0 (21.0 – 33.0)      | 25.0 (21.0 – 34.0)       | 25.5 (21.0 – 41.0)      |
| AST<br>(U/L)     | Sham operation | 20.85 (17.80 – 26.90)     | 20.15 (16.10 – 29.80)   | 21.15 (15.50 – 28.40)    | 23.10 (20.00 – 35.50)   |
|                  | Vehicle        | 25.05 (19.70 – 30.05)     | 20.15 (17.40 – 33.60)   | 22.70 (19.00 – 28.80)    | 29.45 (24.90 – 31.60)   |
|                  | Alteplase      | 23.55 (18.50 – 28.70)     | 23.65 (16.50 – 25.40)   | 23.85 (18.40 – 30.10)    | 26.25 (24.80 – 30.00)   |
|                  | Reteplase      | 20.35 (16.90 – 23.00)     | 21.80 (17.50 – 24.00)   | 24.35 (19.80 – 28.20)    | 23.90 (20.00 – 31.70)   |
| CK<br>(U/L)      | Sham operation | 115.5 (78 - 243)          | 158 (96 - 348)          | 147.5 (100 - 375)        | 137 (71 - 226)          |
|                  | Vehicle        | 128.5 (89 - 212)          | 167.5 (88 - 341)        | 167 (107 - 265)          | 159 (98 - 208)          |
|                  | Alteplase      | 134.5 (98 - 322)          | 191.5 (125 - 315)       | 217.5 (167 - 372)        | 193 (151 - 230)         |
|                  | Reteplase      | 128.5 (107 - 182)         | 183 (130 - 243)         | 188.5 (130 - 243)        | 132.5 (107 - 147)       |
| UREA<br>(mmol/L) | Sham operation | 5.40 (4.43 – 6.59)        | 4.90 (4.14 – 6.47)      | 5.09 (4.04 – 6.57)       | 3.93 (3.24 – 4.57)      |
|                  | Vehicle        | 5.37 (4.15 – 6.41)        | 5.17 (4.04 – 5.93)      | 4.46 (3.78 – 6.11)       | 4.41 (3.25 – 5.14)      |
|                  | Alteplase      | 5.69 (4.74 – 6.32)        | 4.73 (4.16 – 5.51)      | 4.82 (3.41 – 6.00)       | 4.54 (3.60 – 4.81)      |
|                  | Reteplase      | 4.72 (3.13 – 6.13)        | 4.29 (3.25 – 5.12)      | 4.57 (3.32 – 5.68)       | 4.12 (3.46 – 4.24)      |

| Index                         | Group          | before thrombus injection | 60 mins after injection | 60 mins after drug admin | 6 days after drug admin |
|-------------------------------|----------------|---------------------------|-------------------------|--------------------------|-------------------------|
| CREA<br>( $\mu\text{mol/L}$ ) | Sham operation | 47.70 (37.70 – 59.20)     | 45.56 (32.90 – 53.60)   | 47.95 (36.10 – 69.60)    | 51.35 (48.70 – 53.70)   |
|                               | Vehicle        | 46.20 (35.70 – 60.30)     | 42.90 (31.40 – 55.00)   | 39.25 (32.30 – 48.00)    | 51.30 (42.00 – 62.20)   |
|                               | Alteplase      | 51.30 (19.20 – 66.60)     | 44.35 (34.50 – 49.10)   | 37.80 (26.20 – 53.20)    | 53.65 (43.90 – 71.10)   |
|                               | Reteplase      | 42.90 (37.50 – 50.70)     | 39.80 (33.40 – 46.30)   | 34.70 (29.80 – 43.30)    | 49.65 (45.30 – 57.40)   |
| TP2<br>(g/L)                  | Sham operation | 50.30 (43.20 – 53.80)     | 50.20 (45.40 – 54.10)   | 51.60 (49.20 – 55.00)    | 57.70 (49.90 – 59.50)   |
|                               | Vehicle        | 51.55 (43.70 – 59.70)     | 54.55 (45.10 – 60.30)   | 53.00 (50.20 – 57.00)    | 57.90 (45.00 – 69.60)   |
|                               | Alteplase      | 53.90 (44.30 – 61.40)     | 51.60 (44.10 – 57.50)   | 52.25 (36.60 – 56.90)    | 56.05 (51.70 – 65.70)   |
|                               | Reteplase      | 48.95 (42.60 – 64.90)     | 51.65 (4.60 – 56.50)    | 50.40 (49.80 – 54.40)    | 57.40 (52.90 – 61.20)   |
| ALB<br>(g/L)                  | Sham operation | 33.25 (27.50 – 34.50)     | 31.65 (28.80 – 34.80)   | 33.30 (31.20 – 34.10)    | 33.95 (29.90 – 36.60)   |
|                               | Vehicle        | 32.35 (29.30 – 35.50)     | 33.60 (29.80 – 40.20)   | 32.80 (32.30 – 34.60)    | 36.55 (25.90 – 37.00)   |
|                               | Alteplase      | 32.50 (29.10 – 35.70)     | 30.75 (26.90 – 38.30)   | 30.85 (22.50 – 34.40)    | 33.30 (30.40 – 35.30)   |
|                               | Reteplase      | 30.90 (28.20 – 40.10)     | 31.90 (29.80 – 35.70)   | 31.60 (29.80 – 33.00)    | 34.3 (32.70 – 38.20)    |
| GLB<br>(g/L)                  | Sham operation | 17.50 (15.70 – 20.40)     | 18.70 (16.60 – 19.30)   | 19.45 (16.00 – 21.00)    | 22.00 (20.00 – 28.60)   |
|                               | Vehicle        | 18.15 (14.40 – 25.10)     | 19.45 (15.30 – 23.50)   | 19.35 (17.60 – 24.70)    | 21.00 (17.10 – 32.60)   |
|                               | Alteplase      | 19.30 (15.10 – 28.60)     | 18.80 (16.00 – 25.60)   | 18.60 (14.10 – 25.50)    | 24.20 (16.60 – 31.50)   |
|                               | Reteplase      | 18.20 (14.40 – 24.80)     | 19.45 (17.70 – 21.40)   | 19.50 (16.80 – 22.60)    | 22.45 (18.80 – 25.40)   |
| A/G                           | Sham operation | 4.24 (1.64 – 6.20)        | 4.38 (1.62 – 10.78)     | 4.44 (1.52 – 19.69)      | 4.40 (1.05 – 7.02)      |
|                               | Vehicle        | 4.32 (1.35 – 5.96)        | 4.51 (1.38 – 7.21)      | 4.30 (1.31 – 7.17)       | 4.81 (1.13 – 7.07)      |
|                               | Alteplase      | 4.30 (1.15 – 5.98)        | 4.14 (1.13 – 14.26)     | 3.95 (1.16 – 14.87)      | 4.95 (1.09 – 6.10)      |
|                               | Reteplase      | 3.92 (1.42 – 7.89)        | 4.28 (1.53 – 15.24)     | 4.15 (1.41 – 7.85)       | 5.20 (1.41 – 5.83)      |

| Index                       | Group          | before thrombus injection | 60 mins after injection | 60 mins after drug admin | 6 days after drug admin |
|-----------------------------|----------------|---------------------------|-------------------------|--------------------------|-------------------------|
| GLU<br>(mmol/L)             | Sham operation | 5.84 (5.23 – 6.20)        | 7.14 (5.66 – 10.78)     | 6.59 (5.09 – 19.69)      | 5.23 (4.35 – 5.51)      |
|                             | Vehicle        | 5.18 (4.73 – 5.96)        | 5.95 (5.42 – 7.21)      | 5.80 (5.47 – 7.17)       | 5.40 (4.11 – 6.24)      |
|                             | Alteplase      | 5.73 (5.04 – 5.98)        | 9.65 (5.31 – 14.26)     | 7.25 (5.61 – 14.87)      | 5.41 (4.90 – 5.73)      |
|                             | Reteplase      | 5.91 (5.16 – 7.89)        | 7.70 (6.15 – 15.24)     | 6.24 (4.86 – 7.85)       | 5.67 (5.25 – 5.78)      |
| CHO<br>(mmol/L)             | Sham operation | 4.24 (2.71 – 5.19)        | 4.38 (3.05 – 4.98)      | 4.44 (4.09 – 5.04)       | 4.93 (3.89 – 7.02)      |
|                             | Vehicle        | 4.32 (3.71 – 5.10)        | 4.51 (3.82 – 5.26)      | 4.30 (3.84 – 5.56)       | 5.53 (2.99 – 7.07)      |
|                             | Alteplase      | 4.30 (3.39 – 5.34)        | 4.14 (3.39 – 5.17)      | 3.95 (3.16 – 4.81)       | 5.06 (4.39 – 6.10)      |
|                             | Reteplase      | 3.92 (3.67 – 4.89)        | 4.28 (3.86 – 4.78)      | 4.15 (3.19 – 4.64)       | 5.22 (4.70 – 5.83)      |
| TRIGL<br>(mmol/L)           | Sham operation | 0.49 (0.29 – 0.76)        | 0.46 (0.34 – 0.68)      | 0.46 (0.38 – 0.69)       | 0.64 (0.55 – 1.03)      |
|                             | Vehicle        | 0.46 (0.40 – 0.60)        | 0.53 (0.31 – 0.73)      | 0.45 (0.39 – 0.56)       | 0.76 (0.40 – 1.25)      |
|                             | Alteplase      | 0.48 (0.34 – 0.63)        | 0.41 (0.34 – 0.67)      | 0.41 (0.30 – 0.57)       | 0.74 (0.64 – 1.03)      |
|                             | Reteplase      | 0.37 (0.32 – 0.66)        | 0.40 (0.32 – 0.54)      | 0.38 (0.35 – 0.57)       | 0.70 (0.65 – 1.26)      |
| K <sup>+</sup><br>(mmol/L)  | Sham operation | 3.93 (3.50 – 4.44)        | 3.70 (3.22 – 4.45)      | 3.84 (3.33 – 4.36)       | 4.24 (3.77 – 4.53)      |
|                             | Vehicle        | 4.05 (3.40 – 4.32)        | 3.98 (3.74 – 4.20)      | 3.94 (3.63 – 4.20)       | 4.37 (4.01 – 4.88)      |
|                             | Alteplase      | 3.86 (3.54 – 4.35)        | 3.58 (3.22 – 3.94)      | 3.67 (2.79 – 4.02)       | 4.67 (4.28 – 4.89)      |
|                             | Reteplase      | 3.78 (3.21 – 4.39)        | 3.33 (3.01 – 3.85)      | 3.78 (3.30 – 4.10)       | 4.34 (3.89 – 5.20)      |
| Na <sup>+</sup><br>(mmol/L) | Sham operation | 148 (144 - 151)           | 146 (144 -149)          | 147.5 (141 - 159)        | 139.5 (134 - 145)       |
|                             | Vehicle        | 147 (141 - 153)           | 146 (143 - 152)         | 145.5 (144 - 150)        | 144 (139 - 147)         |
|                             | Alteplase      | 145 (132 - 153)           | 141.5 (126 - 148)       | 139 (126 - 148)          | 137 (122 - 145)         |
|                             | Reteplase      | 145 (132 - 149)           | 143 (129 - 146)         | 144 (128 - 148)          | 140 (122- 148)          |
| Cl <sup>-</sup><br>(mmol/L) | Sham operation | 108.05 (106.5 – 112.8)    | 107.85 (103.4 – 111.6)  | 109.15 (103.8 – 115.8)   | 100.45 (94.8 – 102.8)   |
|                             | Vehicle        | 106.2 (104.7 – 114.7)     | 106.3 (104.8 – 113.3)   | 107.55 (105.6 – 113.0)   | 105.55 (98.2 – 108.2)   |

| Index                        | Group          | before thrombus injection | 60 mins after injection | 60 mins after drug admin | 6 days after drug admin |
|------------------------------|----------------|---------------------------|-------------------------|--------------------------|-------------------------|
|                              | Alteplase      | 105.8 (98 – 110.6)        | 103.3 (94.3 – 107.9)    | 99.8 (95.5 – 107.6)      | 100.65 (88.7- 105)      |
|                              | Reteplase      | 105.2 (99.2 – 110.1)      | 104.5 (96 – 106.8)      | 106.55 (94.8 – 111.3)    | 100.7 (87.6 – 108.8)    |
|                              | Sham operation | 2.62 (2.35 – 2.80)        | 2.74 (2.46 – 2.96)      | 2.72 (2.60 – 2.95)       | 2.72 (2.45 – 2.89)      |
| Ca <sup>2+</sup><br>(mmol/L) | Vehicle        | 2.51 (2.25 – 2.74)        | 2.66 (2.41 – 2.77)      | 2.60 (2.50 – 2.75)       | 2.75 (2.30 – 2.99)      |
|                              | Alteplase      | 2.60 (2.42 – 2.68)        | 2.56 (2.33 – 2.69)      | 2.49 (2.50 – 2.75)       | 2.76 (2.61 – 2.89)      |
|                              | Reteplase      | 2.55 (2.31 – 2.76)        | 2.66 (2.49 – 2.78)      | 2.62 (2.50 – 2.78)       | 2.78 (2.55 – 2.90)      |
| BILT<br>(μmol/L)             | Sham operation | 0.55 (0.01 – 1.0)         | 0.40 (0.10 – 2.0)       | 0.55 (0.1 – 2.4)         | 0.55 (0.25 – 1.2)       |
|                              | Vehicle        | 0.65 (-0.3 – 1.2)         | 0.25 (0.01 – 1.3)       | 0.65 (0.4 – 1.6)         | 0.55 (0.1 – 1.3)        |
|                              | Alteplase      | 0.50 (0.01 – 1.1)         | 0.70 (0.3 – 1.2)        | 0.85 (0.7 – 1.4)         | 0.70 (0.5 – 1.6)        |
|                              | Reteplase      | 0.55 (0.20 – 1.1)         | 0.60 (0.5 – 2.6)        | 1.0 (0.1 – 1.4)          | 0.55 (0.3 – 0.7)        |

Data presented as median (range: min - max). (n = 6).



**Table S3. Changes of blood gas indexes**

| Index                                  | Group          | before thrombus injection | 60 mins after injection | right after drug admin | 60 mins after drug admin | 120 mins after drug admin |
|----------------------------------------|----------------|---------------------------|-------------------------|------------------------|--------------------------|---------------------------|
| pH                                     | Sham operation | 7.27 (7.25 – 7.30)        | 7.26 (7.23 – 7.29)      | 7.27 (7.22 – 7.27)     | 7.25 (7.17 – 7.29)       | 7.28 (7.23 – 7.32)        |
|                                        | Vehicle        | 7.28 (7.27 – 7.31)        | 7.25 (7.24 – 7.35)      | 7.26 (7.24 – 7.32)     | 7.30 (7.24 – 7.33)       | 7.31 (7.19 – 7.37)        |
|                                        | Alteplase      | 7.29 (7.27 – 7.31)        | 7.26 (7.15 – 7.35)      | 7.27 (7.10 – 7.32)     | 7.25 (7.14 – 7.31)       | 7.26 (7.12 – 7.31)        |
|                                        | Reteplase      | 7.29 (7.24 – 7.34)        | 7.30 (7.24 – 7.35)      | 7.31 (7.21 – 7.35)     | 7.27 (7.18 – 7.30)       | 7.26 (7.16 – 7.39)        |
| PCO <sub>2</sub> (mmHg)                | Sham operation | 50.85 (43.7 – 58.3)       | 50.05 (43.5 – 58.2)     | 53.45 (46.7 – 62.6)    | 52.85 (40.1 – 69.2)      | 46.85 (44.4 – 60.2)       |
|                                        | Vehicle        | 50.4(33.4 – 59.1)         | 50.5 (38.2 – 56.3)      | 48.5 (41.4 – 52.5)     | 44.65 (36.9 – 51.3)      | 40.45 (35.2 – 62.0)       |
|                                        | Alteplase      | 51.6 (41.6 – 55.5)        | 47.7 (37.4 – 73.8)      | 50.6 (41.7 – 82.8)     | 52.35 (43.3 – 72.8)      | 52.45 (35.4 – 73.3)       |
|                                        | Reteplase      | 46.35 (45.3 – 55.6)       | 49.75 (37.5 – 58.8)     | 49.1 (41.2 – 54.2)     | 52.1 (45.5 – 61.9)       | 55.4 (36.4 - 71)          |
| PO <sub>2</sub> (mmHg)                 | Sham operation | 79 (74 - 237)             | 101.5 (85 - 241)        | 105.5 (87 - 237)       | 170 (83 - 311)           | 109 (81 - 299)            |
|                                        | Vehicle        | 136.5 (27- 236)           | 174 (99 - 219)          | 178 (99 - 234)         | 101 (98 - 224)           | 101.5 (77 - 337)          |
|                                        | Alteplase      | 327.5 (82 - 501)          | 217 (102 - 269)         | 207 (99 - 267)         | 236.5 (110 - 298)        | 188.5 (102 - 276)         |
|                                        | Reteplase      | 76.5 (71 - 570)           | 191.5 (86 - 361)        | 224.5 (119 - 367)      | 172 (106 - 271)          | 89.5 (83 - 367)           |
| TCO <sub>2</sub> ( mmol/L)             | Sham operation | 24.5 (23 - 28)            | 23 (22 -28)             | 25 (23 - 28)           | 24.5 (21 - 28)           | 23.5 (21 - 29)            |
|                                        | Vehicle        | 26.5 (17 - 29)            | 25 (21 - 26)            | 23 (22 - 26)           | 23 (21 - 25)             | 22 (21 - 26)              |
|                                        | Alteplase      | 26 (22 - 28)              | 23 (21 - 29)            | 25.5 (23 - 30)         | 24.5 (22 - 28)           | 25.5 (19 - 26)            |
|                                        | Reteplase      | 25.5 (23 - 27)            | 25 (22 - 29)            | 25 (22 - 27)           | 24.5 (23 - 29)           | 25 (22 - 29)              |
| sO <sub>2</sub> (%)                    | Sham operation | 94 (92 - 100)             | 97 (94 - 100)           | 97.5 (94 - 100)        | 98.5 (95 - 100)          | 97 (94 - 100)             |
|                                        | Vehicle        | 98 (95 -100)              | 99 (97 - 100)           | 99(97 - 100)           | 97 (97 - 100)            | 97 (95 - 100)             |
|                                        | Alteplase      | 100 (95 - 100)            | 99.5 (97 - 100)         | 100 (97 - 100)         | 99.5 (98 - 100)          | 99 (97 - 100)             |
|                                        | Reteplase      | 94 (90 -100)              | 98 (95 - 100)           | 100 (98 - 100)         | 98.5 (96 - 100)          | 96.5 (92 - 100)           |
| HCO <sub>3</sub> <sup>-</sup> (mmol/L) | Sham operation | 23.05 (21.30 – 26.70)     | 21.6 (20.4 – 26.7)      | 23.3 (21.6 – 26.4)     | 23.1 (19.4 – 26.7)       | 22.2 (19.9 - 27)          |
|                                        | Vehicle        | 25.3 (16.3 – 27.2)        | 23.1 (19.6 – 25.0)      | 21.75 (20.3 – 24.9)    | 21.8 (19.6 – 23.1)       | 20.95 (19.7 – 23.8)       |

|                   |                   |                     |                     |                    |                    |                     |
|-------------------|-------------------|---------------------|---------------------|--------------------|--------------------|---------------------|
|                   | Alteplase         | 24.35 (20.6 – 26.7) | 21.7 (19.9 – 26.8)  | 24.1 (21.3 – 27.7) | 22.7 (20.9 – 25.8) | 23.6 (17.9 – 24.3)  |
|                   | Retepase          | 24.1 (21.7 – 25.5)  | 23.35 (20.7 – 27.5) | 23.1 (21.1 – 25.3) | 22.9 (21.2 – 27.5) | 23.35 (20.6 – 27.0) |
| <hr/>             |                   |                     |                     |                    |                    |                     |
| BEecf<br>(mmol/L) | Sham<br>operation | -3.5 (-6 - 0)       | -6 (-7 - 0)         | -3.5 (-6 - -1)     | -5 (-7 - 0)        | -4.5 (-7 - 0)       |
|                   | Vehicle           | -1 (-10 - 0)        | -4 (-8 - -1)        | -5 (-7 - -1)       | -5 (-6 - -3)       | -5 (-7 - -3)        |
|                   | Alteplase         | -2.5 (-6 - 0)       | -4.5 (-7 - 0)       | -3.5 (-5 - 0)      | -4.5 (-7 - -1)     | -5 (-8 - -2)        |
|                   | Retepase          | -2.5 (-5 - 0)       | -3.5 (-5 - 1)       | -4 (-6 - -1)       | -4.5 (-6 - 0)      | -3.5 (-6 - 0)       |

Data presented as median (range: min - max). (n = 6).
